# Supplementary material for: Digital Droplet PCR for the Absolute Quantification of Exon Skipping Induced by Antisense Oligonucleotides in (Pre-)Clinical Development for Duchenne Muscular Dystrophy
Source: PubMed Central journal article supplement (PMC5017733; doi:10.1371/journal.pone.0162467), 2016-09-09
Supplement: pone.0162467.s004.pdf [file pone.0162467.s004.pdf]

**S1 Table. Design of dystrophin cDNA constructs for exon 51 skip amenable deletions**

| Vector ID               | Exons included in vector |         |    |         |         |         |        |    |    |    |    |    |    |         |    |         |
|-------------------------|--------------------------|---------|----|---------|---------|---------|--------|----|----|----|----|----|----|---------|----|---------|
|                         | 41                       | 42      | 43 | 44      | 45      | 46      | 47     | 48 | 49 | 50 | 51 | 52 | 53 | 54      | 55 | 56      |
| $\Delta$ 45-50          |                          | 178/195 |    |         | -       | -       | -      | -  | -  | -  |    |    |    | 138/155 |    |         |
| $\Delta$ 45-50 w/o ex51 | 99/183                   |         |    |         | -       | -       | -      | -  | -  | -  | -  |    |    |         |    | 100/190 |
| $\Delta$ 48-50          |                          |         |    | 8/148   |         |         |        | -  | -  | -  |    |    |    |         |    |         |
| $\Delta$ 48-50 w/o ex51 |                          |         |    | 124/148 |         |         |        | -  | -  | -  | -  |    |    |         |    | 117/190 |
| $\Delta$ 49-50          |                          |         |    |         |         | 146/148 |        |    | -  | -  |    |    |    |         |    |         |
| $\Delta$ 49-50 w/o ex51 |                          |         |    |         | 116/176 |         |        |    | -  | -  | -  |    |    |         |    | 115/190 |
| $\Delta$ 50             |                          |         |    |         |         | 44/148  |        |    |    | -  |    |    |    |         |    |         |
| $\Delta$ 50 w/o ex51p   |                          |         |    |         |         | 138/148 |        |    |    | -  | -  |    |    |         |    | 139/190 |
| $\Delta$ 52             |                          |         |    |         |         |         | 13/150 |    |    |    |    | -  |    |         |    |         |
| $\Delta$ 52 w/o ex51    |                          |         |    |         |         |         |        |    |    |    | -  | -  |    |         |    | 96/173  |
