# Supplementary material for: Digital Droplet PCR for the Absolute Quantification of Exon Skipping Induced by Antisense Oligonucleotides in (Pre-)Clinical Development for Duchenne Muscular Dystrophy
Source: PubMed Central journal article supplement (PMC5017733; doi:10.1371/journal.pone.0162467), 2016-09-09
Supplement: pone.0162467.s005.pdf [file pone.0162467.s005.pdf]

**S2 Table.** Sequences of PCR primers and Taqman probes

| Deletion(s)                    | Assay           | Forward primer                          | Reverse primer                         | Probe (FAM )             | Product length (bp)      |
|--------------------------------|-----------------|-----------------------------------------|----------------------------------------|--------------------------|--------------------------|
| Δ45-50                         | skipped         | CCTGAGAATTGGGAACATGCTAA<br>(exon 44)    | GACGCCTCTGTTCCAAATCC<br>(exon 52)      | ATACAAATGGTATCTTAAGGCAAC | 73                       |
| Δ48-50                         | skipped         | TGAAAATAAGCTCAAGCAGACAAATC<br>(exon 47) | GACGCCTCTGTTCCAAATCC<br>(exon 52)      | CAGTGGATAAAGGCAACA       | 71                       |
| Δ49-50                         | skipped         | CAACCAAACCAAGAAGGACCAT<br>(exon 48)     | GACGCCTCTGTTCCAAATCC<br>(exon 52)      | TGACGTTCAGGCAACA         | 64                       |
| Δ50                            | skipped         | GGGCAGCATTTGTACAAGGAAA<br>(exon 49)     | GACGCCTCTGTTCCAAATCC<br>(exon 52)      | AGCCAGTGAAGGCAA          | 76                       |
| Δ52                            | skipped         | CCTGACCTAGCTCCTGGACTGA<br>(exon 50)     | TGTACTTCATCCCACTGATTCTGAA<br>(exon 53) | CTATTGGAGCCTTTGAAAG      | 71                       |
| Δ45-50, Δ48-50,<br>Δ49-50, Δ50 | non-<br>skipped | GTGATGGTGGGTGACCTTGAG<br>(exon 51)      | GACGCCTCTGTTCCAAATCC<br>(exon 52)      | CAAGCAGAAGGCAACAA        | 82                       |
| Δ52                            | non-<br>skipped | GTGACCTGAGGATATCAACGAGAT<br>(exon 51)   | TGTACTTCATCCCACTGATTCTGAA<br>(exon 53) | ATCAAGCAGAAGTTGAAAG      | 75                       |
| Δ48-50                         | Primary<br>PCR  | AGAACAAAAGAATATCTTGTCAG<br>(exon 46)    | TTGCCTCCGGTTCTGAAGG<br>(exon 52)       | n/a                      | WT: 702<br>w/o ex51: 469 |
|                                | Nested<br>PCR   | CCCATAAGCCCAGAAGAGC<br>(exon 47)        | TCTAGCCTCTTGATTGCTGG<br>(exon 52)      | n/a                      | WT: 401<br>w/o ex51: 168 |
